# Supplementary material for: Selenium atoms induce organic doped systems to produce pure phosphorescence emission
Source: Royal Society of Chemistry journal article supplement (doi:10.1039/d1cc06380d), 2021-12-17
Supplement: d1cc06380d1.pdf [file d1cc06380d1.pdf]

## Electronic Supplementary Information

### Selenium atoms induce organic doped system to produce pure phosphorescence emission

Xinyu Zhang,<sup>‡a</sup> Dan Wang,<sup>‡a</sup> Yunxiang Lei,<sup>\*a</sup> Miaochang Liu,<sup>a</sup> Zhengxu Cai,<sup>b</sup> Huayue Wu,<sup>\*a</sup> Guoming Shen,<sup>a</sup> Xiaobo Huang,<sup>\*a</sup> and Yuping Dong<sup>b</sup>

<sup>a</sup> School of Chemistry and Materials Engineering, Wenzhou University, Wenzhou 325035 (P. R. China)

<sup>b</sup> School of Materials Science & Engineering, Beijing Institute of Technology, Beijing, 10081 (P. R. China)

E-mail: yunxianglei@wzu.edu.cn (Y. Lei); huayuewu@wzu.edu.cn (H. Wu); xiaobhuang@wzu.edu.cn (X. Huang)

<sup>‡</sup> These authors contributed equally to this work

## Contents:

### 1. Materials and characterization

All the host and guest molecules were purified by column chromatography twice, followed by recrystallization.  $^1\text{H}$  spectra were carried out by Bruker ARX500 spectrometer with  $\text{CDCl}_3$  as the solvent. Mass spectra were performed by using Finnigan BIFLEX III mass spectroscopy. UV-vis absorption spectra were measured by Persee TU-1901. Fluorescence spectra were measured by using Hitachi F-7000 spectrophotometer. Phosphorescence spectra were measured by using FLS920 lifetime and steady state spectrometer. X-ray crystal structure analyses were measured by using Bruker-AXS SMART APEX2 CCD diffractometer. Solid-state emission quantum yields were collected by using FluoroMax-4 (Horiba Jobin Yvon) fluorimeter equipped with integrated sphere. The theoretical ground-state geometry and electronic structure were performed using the density functional theory (DFT) with B3LYP hybrid functional at the basis set level of 6-31+G (d, p).

The emission quantum yields were collected by using FluoroMax-4 (Horiba Jobin Yvon) fluorimeter equipped with integrated sphere. When measuring the fluorescence quantum yields, using conventional steady-state testing methods to collect spectra. When measuring the phosphorescence quantum yields, the emission spectra of the materials were collected with a delay time of 50  $\mu\text{s}$  in order to filter the fluorescence emission.

### 2. Synthesis of the target compound

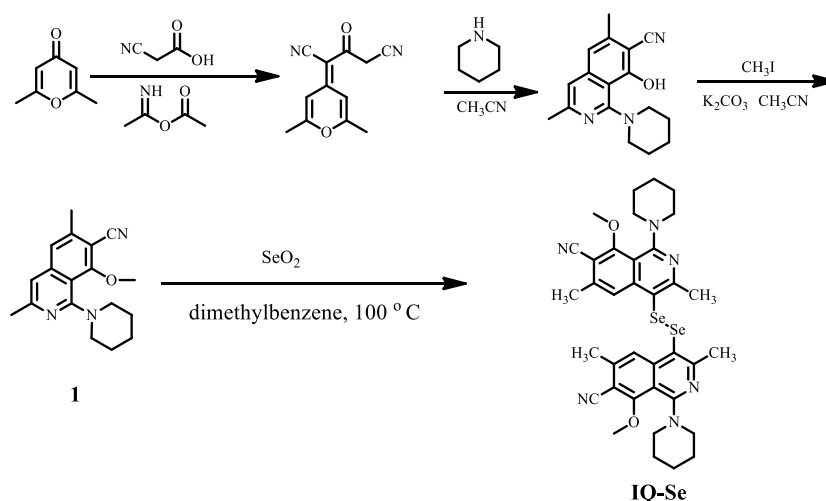

**Scheme S1** Synthetic routes of the guest compound.

#### Synthesis of intermediate 1

The 8-methoxy-3,6-dimethyl-1-(piperidin-1-yl)isoquinoline-7-carbonitrile (**1**) was synthesized according to the previous method.<sup>1</sup>

#### Synthesis of guest IQ-Se

Intermediate compound **1** (1 mmol) and selenium dioxide (3.0 mmol) were added to the xylene (15.0 mL) solvent. The mixture was stirred for 12 h at 100 °C. After the reaction solution was cooled to room temperature, the mixture was extracted with dichloromethane. After removing the solvent under reduced pressure, the crude product was purified by column chromatography (petroleum ether/ethyl acetate = 10:1, v/v) to obtain target product.

**4,4'-Diselanediybis(8-methoxy-3,6-dimethyl-1-(piperidin-1-yl)isoquinoline-7-carbonitrile)**

(**IQ-Se**). Light yellow solid, 68% yield. <sup>1</sup>H NMR (CDCl<sub>3</sub>, 500 MHz): δ 8.00 (s, 1H), 7.75 (s, 1H), 3.88-3.86 (d, 6H), 3.72-3.21 (br, 6H), 2.65-2.38 (m, 12H), 1.72-1.61 (d, 12H) ppm.

**Reference:**

- (a) Y. Chen, Y. Xie, H. S, Y. Lei, Y. Zhou, W. Dai, Z. Cai, M. Liu, X. Huang and H. Wu, *Chem. Eur. J.*, 2020, **26**, 17376-17380; (b) X. Liu, Y. Pan, Y. Lei, N. Liu, W. Dai, M. Liu, Z. Cai, H. Wu, X. Huang and Y. Dong, *J. Phys. Chem. Lett.*, 2021, **12**, 7357-7364.

**3. Details of SOC theoretical calculation**

SOC calculation details of **IQ-Se**

```
! B3LYP/G 6-311G* RIJCOSX grid4 gridx4 tightSCF miniprint
```

```
%tddft
```

```
nroots 10
```

```
dosoc true
```

```
tda false
```

```
printlevel 3
```

```
end
```

```
* xyz 0 1
```

|    |             |             |             |
|----|-------------|-------------|-------------|
| Se | -0.73015079 | 3.60301573  | 0.92857804  |
| Se | 0.72988366  | 3.60295449  | -0.92875837 |
| O  | -2.92268308 | -2.64746316 | 0.95822361  |
| O  | 2.92303720  | -2.64730109 | -0.95854662 |
| N  | -3.81244046 | 1.26535440  | -0.57513853 |
| N  | -0.44148380 | -4.12477650 | 2.89208649  |
| N  | -4.82124834 | -0.74476468 | -0.04601781 |
| N  | 3.81208386  | 1.26542640  | 0.57541476  |
| N  | 0.44236862  | -4.12464989 | -2.89313822 |
| N  | 4.82108501  | -0.74466913 | 0.04651789  |
| C  | -2.89146927 | 2.23730347  | -0.39461115 |
| C  | -1.86432310 | 2.10908762  | 0.53414642  |
| C  | -1.66022933 | 0.84475261  | 1.16835629  |
| C  | -0.56335647 | 0.60538241  | 2.03755762  |
| H  | 0.07727694  | 1.44541835  | 2.27708848  |
| C  | -0.28608369 | -0.63714767 | 2.55401562  |
| C  | -1.10784673 | -1.73146096 | 2.14426547  |
| C  | -2.20943166 | -1.53424501 | 1.31174291  |

|   |             |             |             |
|---|-------------|-------------|-------------|
| C | -2.56717547 | -0.22695101 | 0.86993432  |
| C | -3.73715793 | 0.11268679  | 0.08039783  |
| C | -3.06617825 | 3.47332012  | -1.23930827 |
| H | -3.93956242 | 3.35720513  | -1.88345399 |
| H | -2.17339798 | 3.64530726  | -1.85225045 |
| H | -3.18919718 | 4.36419912  | -0.61363687 |
| C | 0.87054266  | -0.85831494 | 3.49372647  |
| H | 1.44451170  | 0.06245896  | 3.62696180  |
| H | 1.54669332  | -1.63771133 | 3.12410904  |
| H | 0.51954404  | -1.19156704 | 4.47817369  |
| C | -0.77373215 | -3.06229040 | 2.55023443  |
| C | -2.63557815 | -3.17695100 | -0.34582151 |
| H | -2.94886409 | -2.47640046 | -1.12696918 |
| H | -3.21415131 | -4.09819112 | -0.42739402 |
| H | -1.56991924 | -3.40881392 | -0.44625122 |
| C | -5.81771504 | -0.41846123 | -1.07989732 |
| H | -5.29051837 | -0.03805197 | -1.95530165 |
| H | -6.47838749 | 0.39322469  | -0.73235605 |
| C | -6.64361414 | -1.66096168 | -1.43069219 |
| H | -7.39297352 | -1.38382859 | -2.18255847 |
| H | -5.98430882 | -2.40730784 | -1.89378459 |
| C | -7.31575804 | -2.26379215 | -0.19099581 |
| H | -8.07353208 | -1.56222167 | 0.18785431  |
| H | -7.84434568 | -3.18922754 | -0.44936373 |
| C | -6.27383603 | -2.52331384 | 0.90432696  |
| H | -5.59391196 | -3.32771888 | 0.60019540  |
| H | -6.75902616 | -2.84420225 | 1.83440829  |
| C | -5.45262581 | -1.26504403 | 1.18660433  |
| H | -6.11523680 | -0.47878525 | 1.59102873  |
| H | -4.68868646 | -1.46824034 | 1.93272777  |
| C | 2.89116048  | 2.23734851  | 0.39475206  |
| C | 1.86412104  | 2.10914842  | -0.53417304 |
| C | 1.66020936  | 0.84479366  | -1.16843095 |
| C | 0.56342927  | 0.60537474  | -2.03775461 |
| H | -0.07725602 | 1.44538162  | -2.27726274 |
| C | 0.28632254  | -0.63713211 | -2.55434432 |
| C | 1.10819484  | -1.73138336 | -2.14467138 |
| C | 2.20965462  | -1.53415524 | -1.31198998 |
| C | 2.56719977  | -0.22686411 | -0.86996961 |
| C | 3.73698260  | 0.11276003  | -0.08015518 |
| C | 3.06581183  | 3.47341721  | 1.23937479  |
| H | 2.17294750  | 3.64553829  | 1.85213365  |
| H | 3.18897133  | 4.36426314  | 0.61360231  |
| H | 3.93908858  | 3.35733920  | 1.88367407  |

|   |             |             |             |
|---|-------------|-------------|-------------|
| C | -0.87022458 | -0.85832605 | -3.49414664 |
| H | -0.51918474 | -1.19189829 | -4.47847853 |
| H | -1.44401173 | 0.06251571  | -3.62766078 |
| H | -1.54656167 | -1.63750741 | -3.12440933 |
| C | 0.77435976  | -3.06218155 | -2.55098362 |
| C | 2.63544022  | -3.17729035 | 0.34521512  |
| H | 2.94778472  | -2.47670891 | 1.12670729  |
| H | 3.21457070  | -4.09816075 | 0.42692981  |
| H | 1.56986901  | -3.40983647 | 0.44491722  |
| C | 5.45298840  | -1.26447234 | -1.18605474 |
| H | 6.11551170  | -0.47793870 | -1.59008602 |
| H | 4.68932433  | -1.46770907 | -1.93244388 |
| C | 6.27440876  | -2.52261781 | -0.90384695 |
| H | 6.76000186  | -2.84311574 | -1.83385201 |
| H | 5.59456507  | -3.32727353 | -0.60019520 |
| C | 7.31589251  | -2.26319335 | 0.19191421  |
| H | 7.84457111  | -3.18860006 | 0.45019971  |
| H | 8.07366120  | -1.56136366 | -0.18647351 |
| C | 6.64319075  | -1.66084757 | 1.43153940  |
| H | 7.39222781  | -1.38376355 | 2.18374394  |
| H | 5.98387982  | -2.40745821 | 1.89419885  |
| C | 5.81715358  | -0.41842756 | 1.08079678  |
| H | 5.28959480  | -0.03836534 | 1.95613965  |
| H | 6.47777010  | 0.39349747  | 0.73370831  |

\*

### SOC calculation details of IQ

! B3LYP/G 6-311G\* RIJCOSX grid4 gridx4 tightSCF miniprint

%tddft

nroots 10

dosoc true

tda false

printlevel 3

end

\* xyz 0 1

|   |             |             |             |
|---|-------------|-------------|-------------|
| O | 0.35823727  | -1.84998404 | 0.38573889  |
| N | -1.33442992 | 2.11992831  | 0.15580077  |
| N | 3.50130171  | -3.28214760 | 0.22742217  |
| N | -1.88295785 | -0.12164146 | -0.05807697 |
| C | -0.46128857 | 3.16140467  | 0.13591540  |
| C | 0.88106106  | 2.98180551  | -0.10761028 |
| H | 1.55117761  | 3.83156953  | -0.19796011 |
| C | 1.40612727  | 1.66786780  | -0.18170045 |
| C | 2.79927076  | 1.44518653  | -0.34275758 |
| H | 3.44302758  | 2.30854239  | -0.49025833 |

|   |             |             |             |
|---|-------------|-------------|-------------|
| C | 3.35089343  | 0.18674164  | -0.29929587 |
| C | 2.47557385  | -0.91310457 | -0.03708308 |
| C | 1.09888875  | -0.73156287 | 0.10989746  |
| C | 0.51166860  | 0.55802465  | -0.03441190 |
| C | -0.90687189 | 0.87551896  | 0.01719521  |
| C | -1.07077239 | 4.52220154  | 0.34753257  |
| H | -1.86703247 | 4.70294047  | -0.38338123 |
| H | -0.32532013 | 5.31822151  | 0.26261039  |
| H | -1.53211408 | 4.58090704  | 1.34081858  |
| C | 4.82875250  | -0.04361534 | -0.48016458 |
| H | 5.02471672  | -0.69885059 | -1.33735061 |
| H | 5.26631102  | -0.53605274 | 0.39620546  |
| H | 5.35377291  | 0.90159996  | -0.64309075 |
| C | 3.01539776  | -2.23070620 | 0.10979057  |
| C | -1.87527187 | -0.97534509 | -1.26590962 |
| H | -0.84969337 | -1.21897638 | -1.53437683 |
| H | -2.31391627 | -0.40295073 | -2.10381257 |
| C | -2.68498099 | -2.25331424 | -1.04528744 |
| H | -2.68811999 | -2.83719085 | -1.97420270 |
| H | -2.18231316 | -2.86064024 | -0.28306252 |
| C | -4.11762345 | -1.92627511 | -0.60441743 |
| H | -4.65359726 | -1.44918211 | -1.43812116 |
| H | -4.66731063 | -2.84374874 | -0.36107542 |
| C | -4.09978781 | -0.97124615 | 0.59627002  |
| H | -5.11808964 | -0.65409164 | 0.85427184  |
| H | -3.69160172 | -1.48966696 | 1.47432371  |
| C | -3.24991058 | 0.27346346  | 0.31606396  |
| H | -3.19217132 | 0.91427527  | 1.19740944  |
| H | -3.71164792 | 0.87884750  | -0.48198467 |
| C | 0.01884426  | -2.02518174 | 1.76852710  |
| H | 0.92406975  | -2.04910773 | 2.38641459  |
| H | -0.48886878 | -2.98908927 | 1.83152394  |
| H | -0.65439864 | -1.23163892 | 2.10784177  |

\*

#### 4. Figures and tables

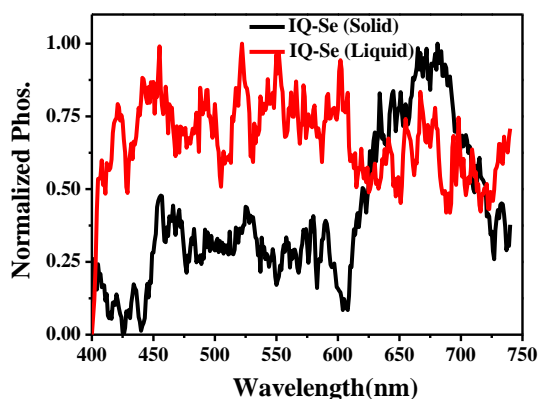

**Fig. S1** Normalized fluorescence spectra of IQ-Se at room temperature. (Ex. = 360 nm).

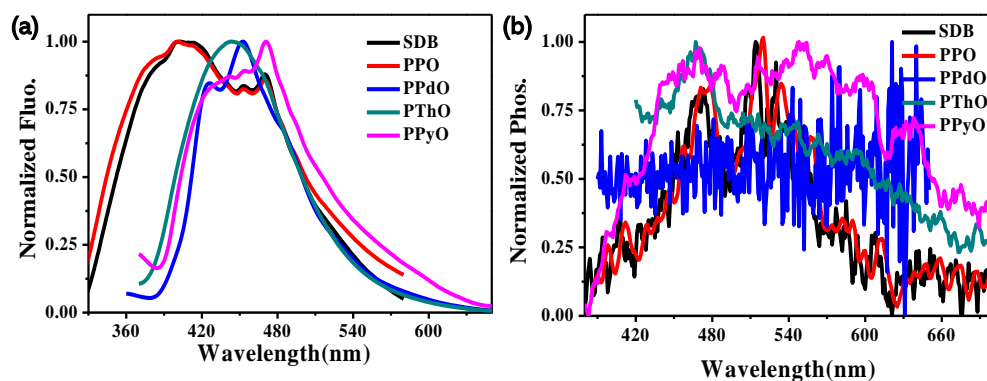

**Fig. S2** (a) Normalized fluorescence spectra of five solid state hosts at room temperature. (b) Phosphorescence spectra of five solid state hosts at room temperature. (Ex. = 360 nm, Delayed time: 0.5 ms).

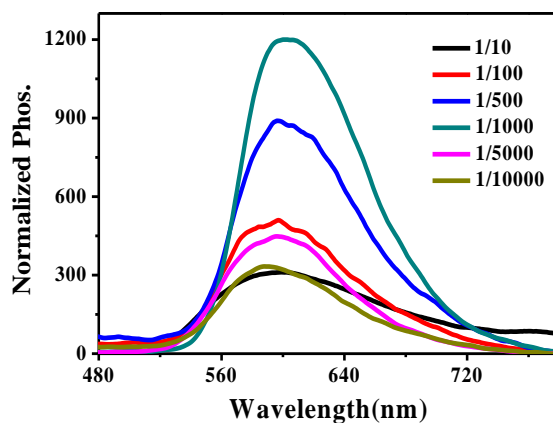

**Fig. S3** Delayed emission spectra of the IQ-Se/SDB doped materials with different amounts of IQ-Se (Molar ratio). (Ex. = 360 nm, Delayed time: 0.5 ms).

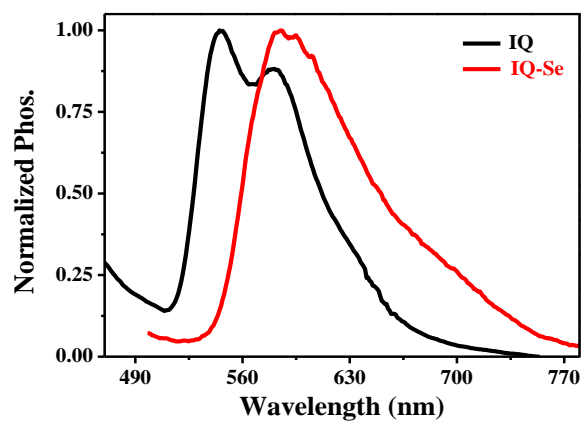

**Fig. S4** Delayed emission spectra of the IQ and IQ-Se solution at 77K. (Solvent: THF; Concentration:  $1.0 \times 10^{-5}$  mol/L; Delayed time: 0.5 ms).

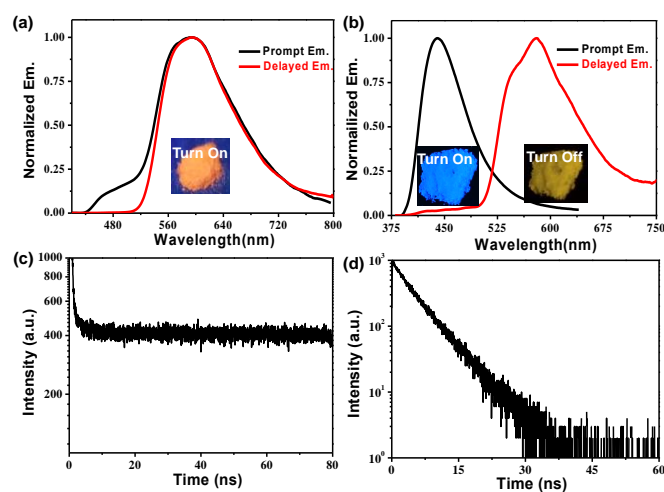

**Fig. S5** (a) Prompt spectra and delayed spectra of IQ-Se/PPO. Inset photo: Luminous picture of IQ-Se/PPO under 365 nm UV lamp. (b) Prompt spectra and delayed spectra of IQ/PPO. Inset photo: Luminous pictures of IQ /PPO under different conditions. (c) Time-resolved prompt emission decay curves of IQ-Se/PPO. (d) Time-resolved prompt emission decay curves of IQ/PPO. ( $\lambda_{ex}$ . Phos: 360 nm, Delayed time: 0.5 ms).



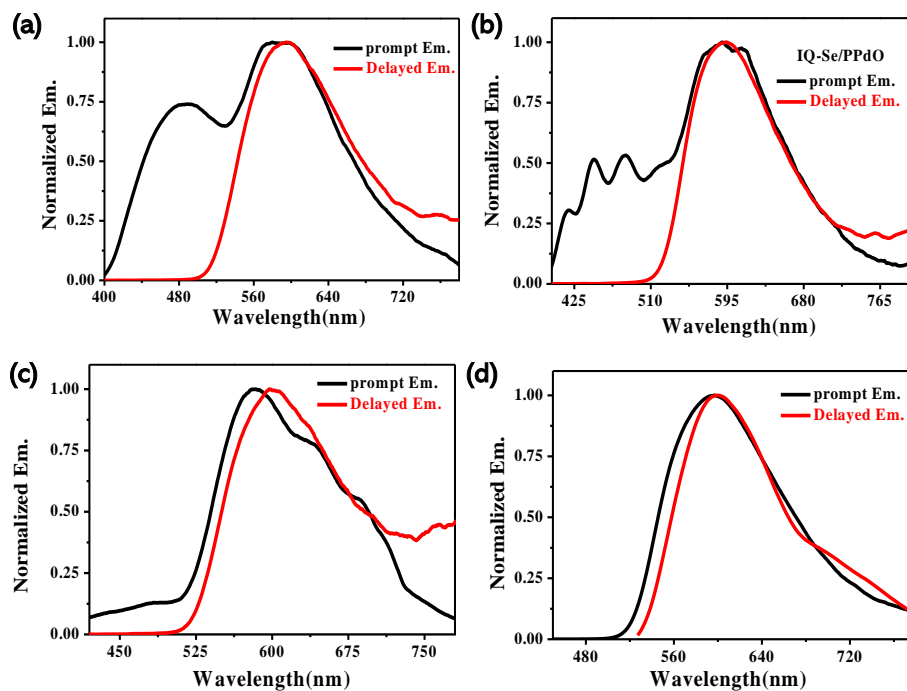

**Fig. S6** Prompt spectra and delayed spectra of IQ-Se/SDB (a), IQ-Se/PPyO (b), IQ-Se/PPdO (c), and IQ-Se/PThO (d).

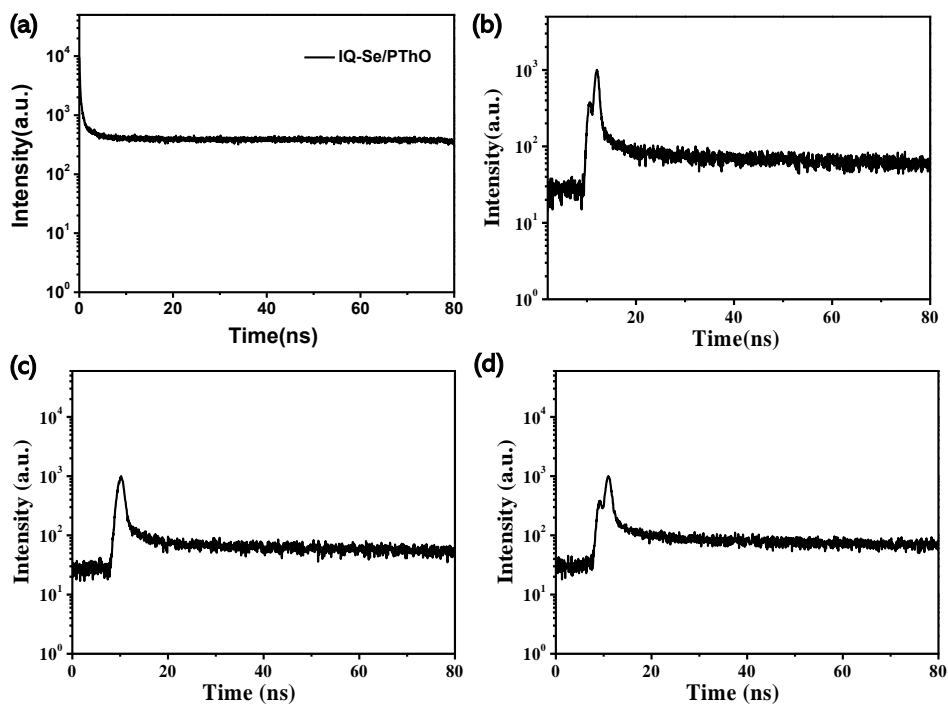

**Fig. S7** Time-resolved prompt emission decay curves of IQ-Se/SDB (a), IQ-Se/PPyO (b), IQ-Se/PPdO (c), and IQ-Se/PThO (d).

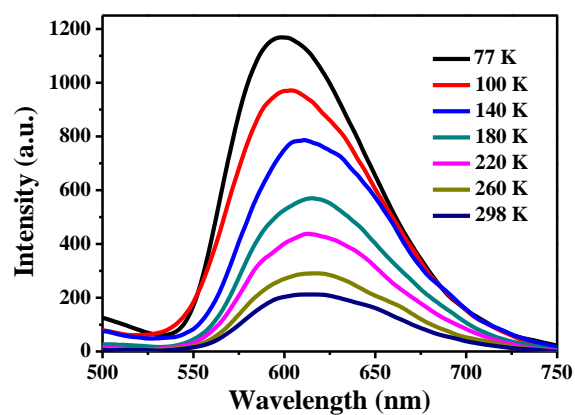

Fig. S8 Delayed spectra of IQ-Se/PPO at different temperatures.

Table S1 Phosphorescence properties of the doped materials

|                     | IQ-Se/SDB | IQ-Se/PPO | IQ-Se/PPyO | IQ-Se/PPdO | IQ-Se/PThO |
|---------------------|-----------|-----------|------------|------------|------------|
| $\lambda_{em}$ (nm) | 596       | 600       | 597        | 601        | 598        |
| $\tau$ (ms)         | 0.75      | 3.6       | 8.9        | 16.4       | 22.3       |
| QY (%)              | 18.3      | 14.2      | 11.6       | 15.6       | 16.7       |

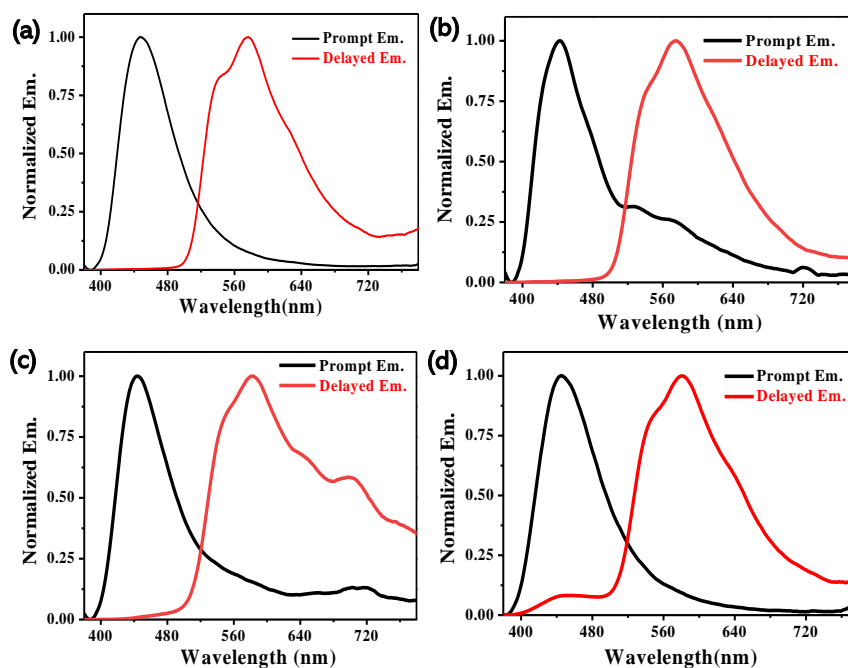

Fig. S9 Prompt spectra and delayed spectra of IQ/SDB (a), IQ/PPyO (b), IQ/PPdO (c), and IQ/PThO (d).

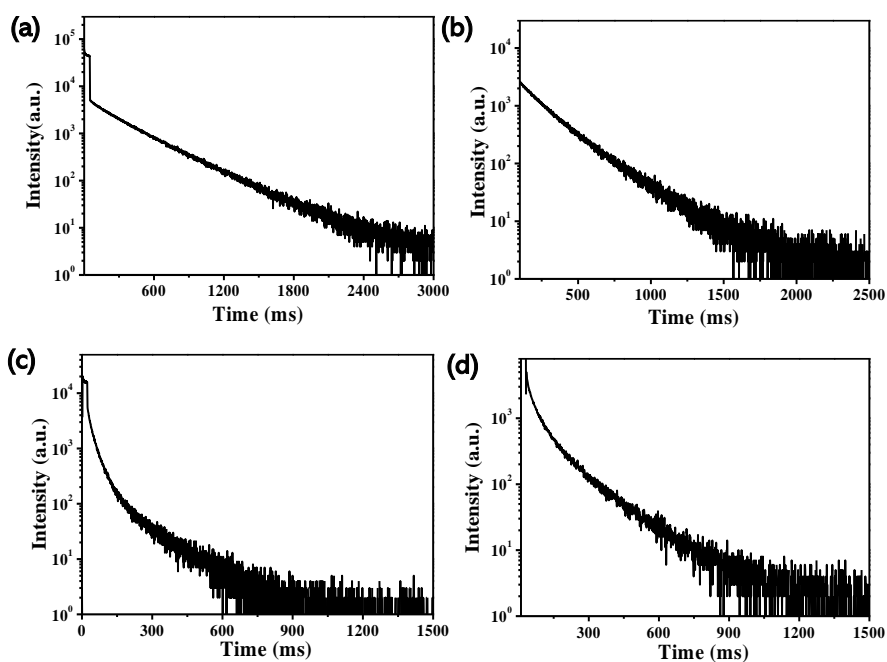

**Fig. S10** Time-resolved delayed emission decay curves of IQ/SDB (a), IQ/PPyO (b), IQ/PPdO (c), and IQ/PThO (d).

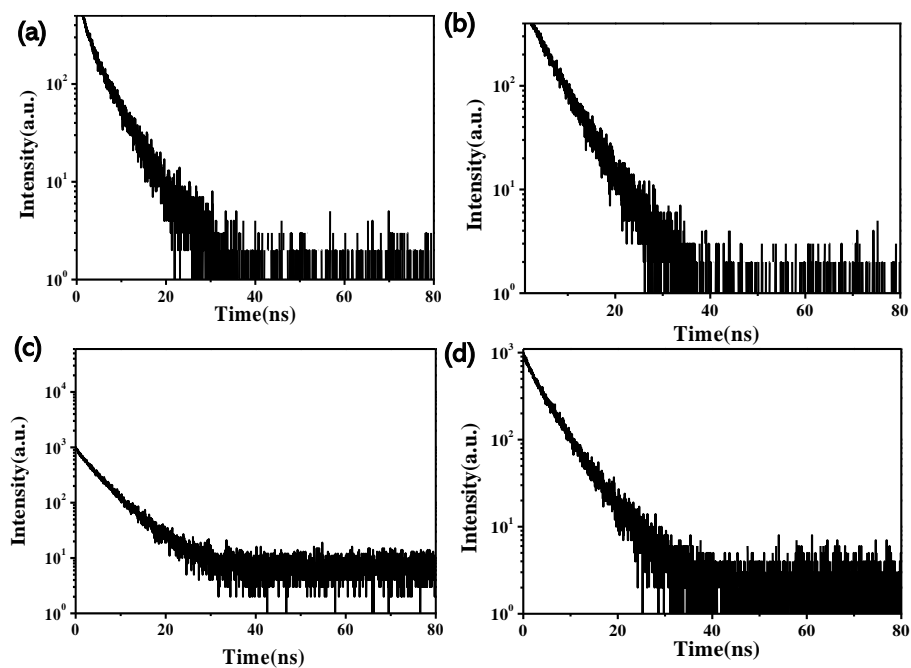

**Fig. S11** Time-resolved prompt emission decay curves of IQ/SDB (a), IQ/PPyO (b), IQ/PPdO (c), and IQ/PThO (d).

**Table S2.** Photophysical properties of the doped materials

|                            | IQ/SDB | IQ/PPO | IQ/PPyO | IQ/PPdO | IQ/PThO |
|----------------------------|--------|--------|---------|---------|---------|
| $\tau_{\text{Fluo.}}$ (ns) | 1.85   | 2.13   | 2.32    | 2.34    | 2.10    |
| $\tau_{\text{Phos.}}$ (ms) | 224    | 187    | 165     | 103     | 87      |
| QY. Phos. (%)              | 11.7   | 15.2   | 7.8     | 13.5    | 8.4     |
| QY. Fluo. (%)              | 35.6   | 28.7   | 32.4    | 26.6    | 33.8    |

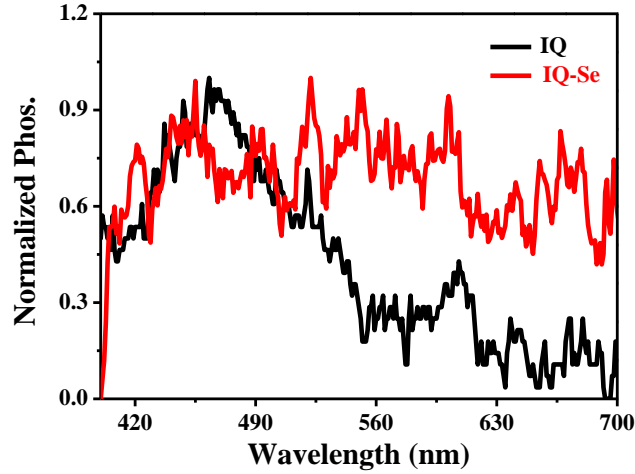**Fig. S12** Normalized phosphorescence spectra of IQ and IQ-Se at room temperature. (Ex. = 360 nm; Delayed time: 50  $\mu$ s).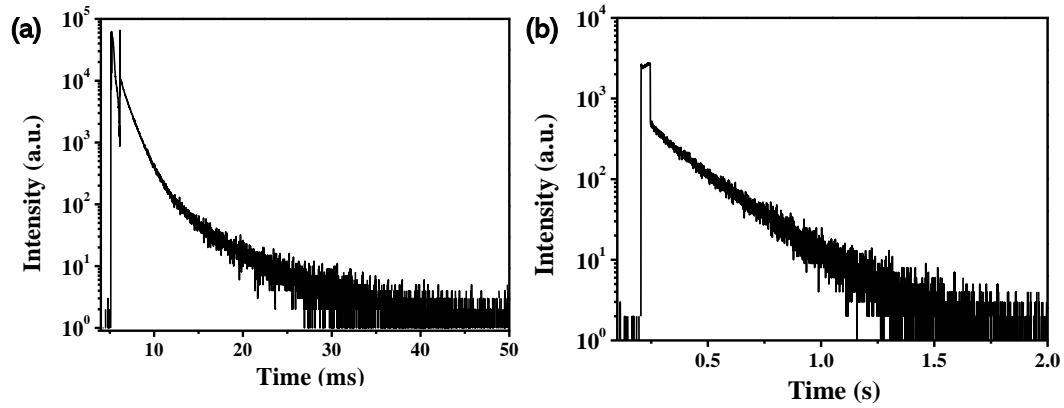**Fig. S13** Time-resolved delayed emission decay curves of IQ-Se (a) and IQ (b) at room temperature (77 K).

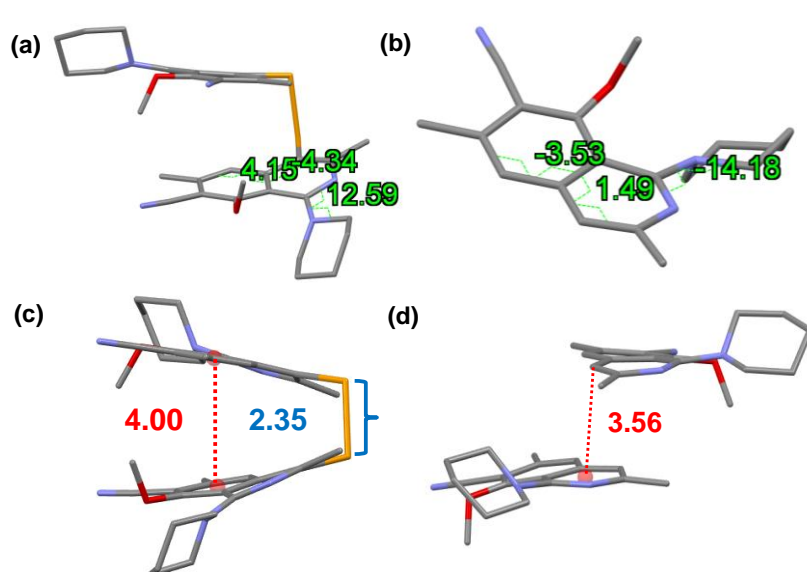

**Fig. S14** (a) Molecular configuration of single crystal IQ-Se. (b) Molecular configuration of single crystal IQ. (c) Intramolecular effective distance of single crystal IQ-Se. (d) Intermolecular effective distance of single crystal IQ.

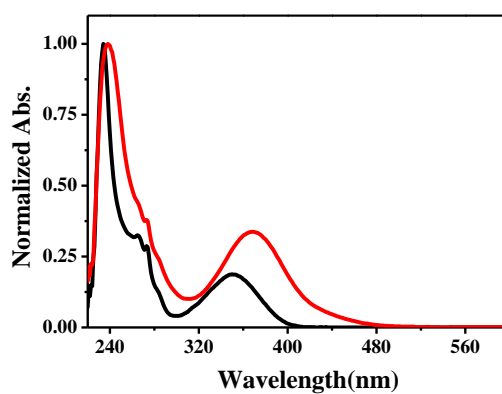

**Fig. S15** UV absorption spectra IQ and IQ-Se in solution state.

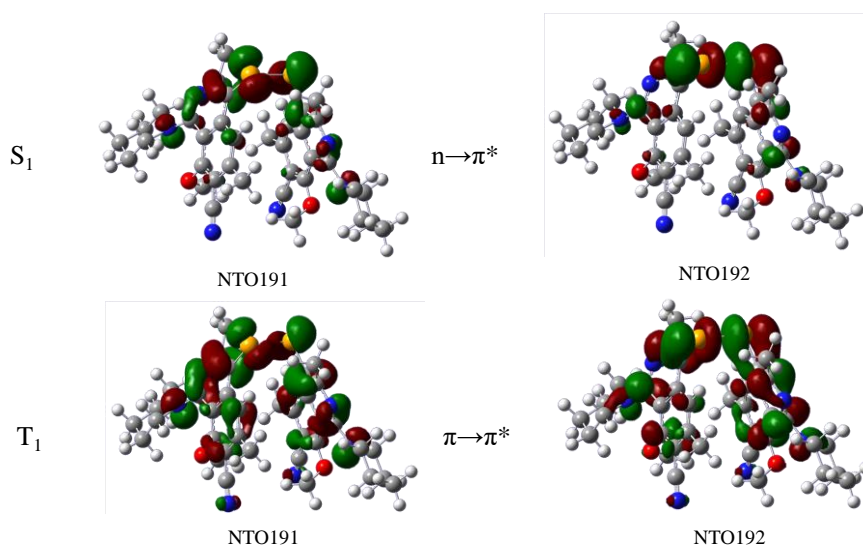

**Fig. S16.** Natural transition orbitals (NTO) of the singlet and triplet states of the IQ-Se.

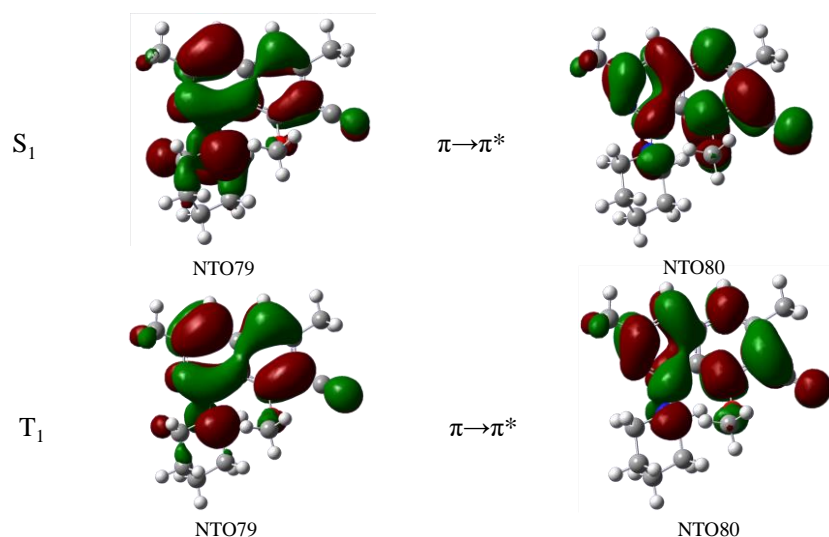

**Fig. S17.** Natural transition orbitals (NTO) of the singlet and triplet states of the **IQ**.

As shown in Fig. S18, the maximum wavelength of **SDB** is 298 nm, while that of **IQ-Se** is 370 nm. Next, the phosphorescence emission of **IQ-Se/SDB** at different excitation wavelengths were investigated, the results showed that the phosphorescence intensity at the excitation wavelength of 370 nm is much stronger than that at the excitation wavelength of 300 nm (Fig. S17). Furthermore, even if the excitation wavelength extends to 420 nm, in which **SDB** hardly absorbs the energy of this band, the doped material still shows phosphorescence emission (Fig. S17). These results clearly demonstrate that the phosphorescence should come from the energy absorbed by the guest molecules. We have tried to test the UV transient absorption of doped materials, but the current test is mainly for samples in solution. The requirements for solid samples are too harsh and it is difficult to obtain valid data. But in future work, we will work hard to study the in-depth luminescence mechanism of doped materials.

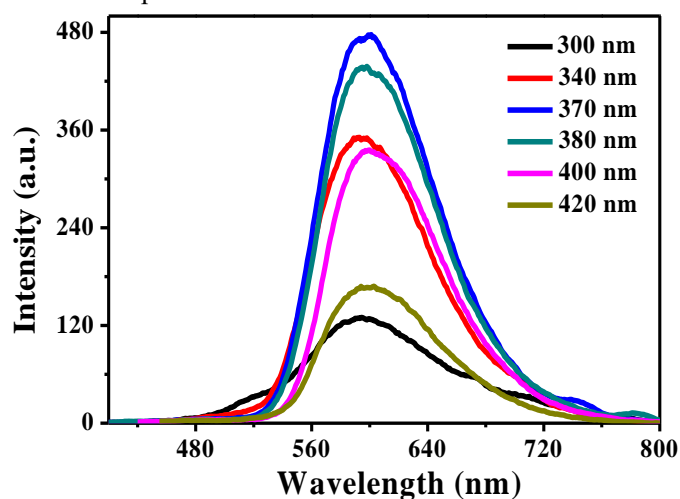

**Fig. S18.** Delayed emission spectra of **IQ-Se/SDB** under different excitation wavelengths.

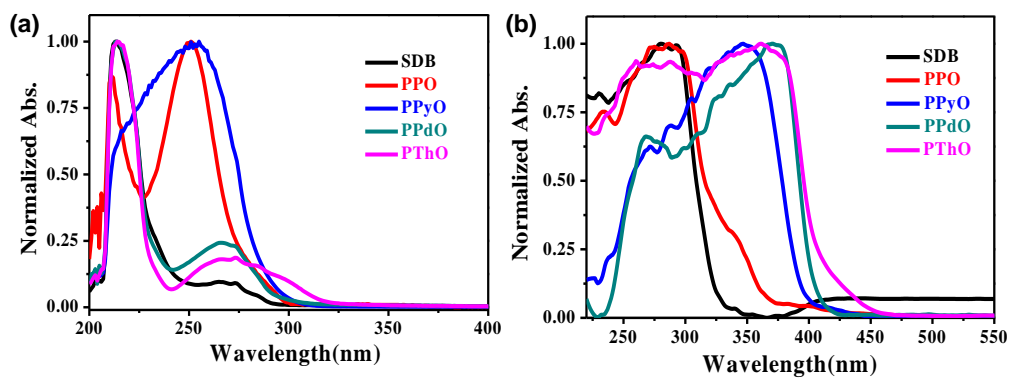

Fig. S19 UV absorption spectra of five hosts in solution state (a) and solid state (b).

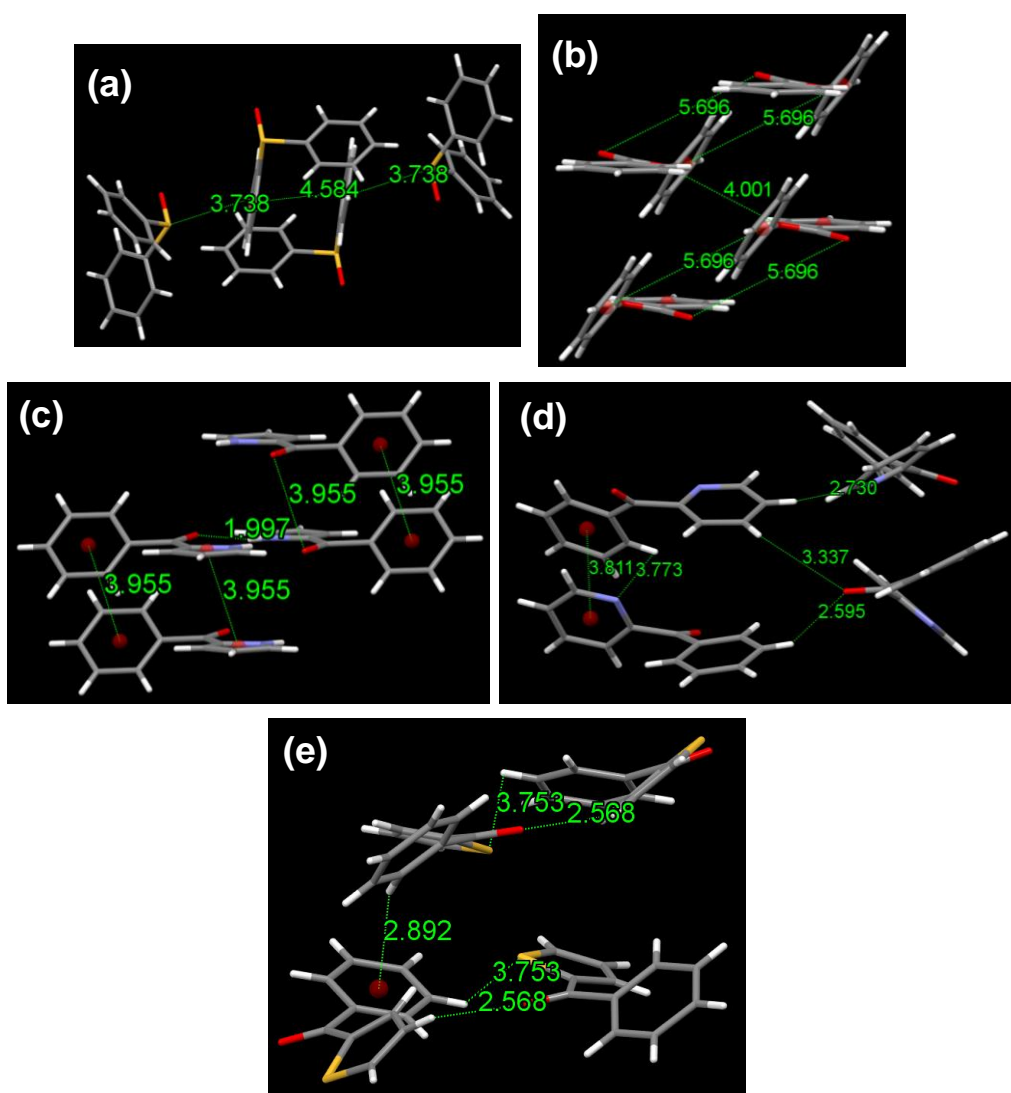

Fig. S20 Single crystal of SDB (a), PPO (b), PPyO (c), PPdO (d), and PThO (e).

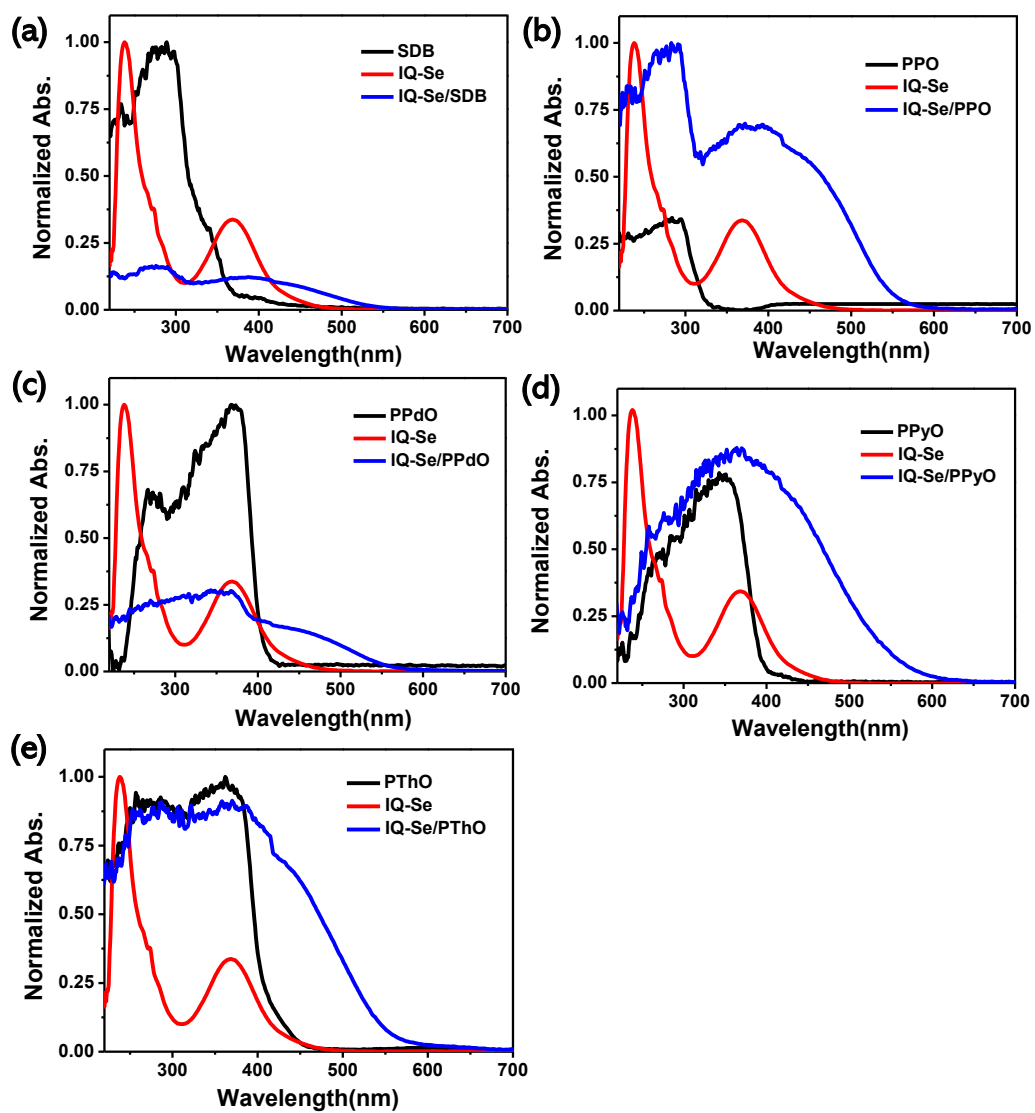

Fig. S21 Absorption wavelengths of the guest, hosts and doped materials



Table S3. Crystal data of guest and five hosts.

|                             | <b>IQ-Se</b>                                                                  | <b>SDB</b>                         | <b>PPO</b>                                     | <b>PPdO</b>                       | <b>PThO</b>                       | <b>PPyO</b>                       |
|-----------------------------|-------------------------------------------------------------------------------|------------------------------------|------------------------------------------------|-----------------------------------|-----------------------------------|-----------------------------------|
| CCDC (NO.)                  | 2120642                                                                       | 209810                             | 2121526                                        | 2086860                           | 2121522                           | 2121523                           |
| Empirical formula           | C <sub>36</sub> H <sub>40</sub> N <sub>6</sub> O <sub>2</sub> Se <sub>2</sub> | C <sub>12</sub> H <sub>10</sub> OS | C <sub>13</sub> H <sub>10</sub> O <sub>2</sub> | C <sub>12</sub> H <sub>9</sub> NO | C <sub>11</sub> H <sub>8</sub> OS | C <sub>11</sub> H <sub>9</sub> NO |
| Formula weight              | 746.66                                                                        | 202.26                             | 198.21                                         | 183.20                            | 188.23                            | 171.19                            |
| Temperature (K)             | 293(2)                                                                        | 293(2)                             | 293(2)                                         | 293(2)                            | 293(2)                            | 293(2)                            |
| Crystal system              | Monoclinic                                                                    | Monoclinic                         | Monoclinic                                     | Orthorhombic                      | Orthorhombic                      | Triclinic                         |
| Space group                 | C 2/c                                                                         | P 21/n                             | P 21/c                                         | P 21 21 21                        | P 21 21 21                        | P -1                              |
| Z                           | 8                                                                             | 4                                  | 4                                              | 4                                 | 4                                 | 2                                 |
| Dcalcd [Mg/m <sup>3</sup> ] | 1.432                                                                         | 1.299                              | 1.287                                          | 1.280                             | 1.334                             | 1.313                             |
| F (000)                     | 3056                                                                          | 424                                | 416                                            | 384                               | 392                               | 180                               |
| θ range [°]                 | 2.572-25.9                                                                    | 2.736-2                            | 2.761-25.9                                     | 3.071-26.0                        | 3.161-25.9                        | 2.993-25.9                        |
|                             | 97°                                                                           | 5.991°                             | 96°                                            | 00°                               | 89°                               | 99°                               |
| R <sub>1</sub> [I>2σ(I)]    | 0.0330                                                                        | 0.0389                             | 0.0368                                         | 0.0342                            | 0.0337                            | 0.0409                            |
| wR <sub>2</sub> [I>2σ(I)]   | 0.0774                                                                        | 0.0849                             | 0.0907                                         | 0.0799                            | 0.0841                            | 0.0981                            |
| a [Å]                       | 37.8827(10)                                                                   | 8.3623(15)                         | 5.6958(4)                                      | 8.055(4)                          | 7.6504(4)                         | 3.9549(4)                         |
| b [Å]                       | 8.5799(3)                                                                     | 14.109(2)                          | 14.7552(10)                                    | 10.096(6)                         | 10.2520(5)                        | 10.6225(13)                       |
| c [Å]                       | 21.8681(6)                                                                    | 8.9317(18)                         | 12.4061(10)                                    | 11.687(5)                         | 11.9536(5)                        | 10.6802(11)                       |
| α [deg]                     | 90                                                                            | 90                                 | 90                                             | 90                                | 90                                | 98.127(4)                         |
| β [deg]                     | 103.0210(10)                                                                  | 101.138(7)                         | 101.086(2)                                     | 90                                | 90                                | 98.311(3)                         |
| γ [deg]                     | 90                                                                            | 90                                 | 90                                             | 90                                | 90                                | 98.368(4)                         |
| V [Å <sup>3</sup> ]         | 6925.0(4)                                                                     | 1034.0(3)                          | 1023.19(13)                                    | 950.5(9)                          | 937.54(8)                         | 433.16(8)                         |
| GOF                         | 1.035                                                                         | 1.039                              | 1.040                                          | 1.035                             | 1.070                             | 1.053                             |
| R(int)                      | 0.0503                                                                        | 0.0366                             | 0.0245                                         | 0.0326                            | 0.0218                            | 0.0366                            |
| No. of reflens collected    | 34082                                                                         | 10955                              | 11579                                          | 7946                              | 4627                              | 5986                              |
| No. of unique reflens       | 6779                                                                          | 2031                               | 1982                                           | 1845                              | 1812                              | 1690                              |
| R <sub>1</sub> (all data)   | 0.0517                                                                        | 0.0539                             | 0.0444                                         | 0.0404                            | 0.0382                            | 0.0577                            |
| wR <sub>2</sub> (all data)  | 0.0863                                                                        | 0.0955                             | 0.0974                                         | 0.0845                            | 0.0879                            | 0.1100                            |
